# Supplementary material for: Superoxide dismutase activity in tear fluid and blood of patients and mouse model of amyotrophic lateral sclerosis: a pilot study
Source: PeerJ. 2025 Jul 1;13:e19623. doi: 10.7717/peerj.19623 (PMC12227013; doi:10.7717/peerj.19623)
Supplement: Supplemental Information 1 [file peerj-13-19623-s001.xlsx]

## Sheet: Fig. 1 А
Control	ALS
353.55	0
36.53	0
80.22	0
116.03	0
113.88	0
313.12	0
937.6	0
833.12	966.21
1168.9	1157.72
1338.2	346.44
593.2	1399.3
451.3	792.7
0	1504
0	396.3
423.84	115.7
119.04	322.5
198.07	38.9
0	212.5
1022.45	484.3
1131.13	493.5
631.8
834.7
142.59
176.98
0 = below than 10

## Sheet: Fig.1 B
Control	ALS
317.02	966.21
199.24	811.08
104.48	606.6
169.3	1107.7
141.9	206.8
304.8	173.6
198.07	9.2
108.68
35.81
202.9
34.39

## Sheet: Fig. 1 C
Control	ALS
10.93	39.26
58.15	133.7
124.25	120.66
120.93	143.46
104.21	129.13
64.51	114.12
64.51	119.39
93.76	120.86
114.12	133.62
81.58	129.13
43
108.35

## Sheet: Fig. 2
Group	SOD activity (U/ml)
Control	0
Control	0
Control	0
Control	36.53
Control	80.22
Control	113.88
Control	116.03
Control	119.04
Control	142.59
Control	176.98
Control	198.07
Control	313.12
Control	353.55
Control	423.84
Control	451.3
Control	593.2
Control	631.8
Control	833.12
Control	834.7
Control	937.6
Control	1022.45
Control	1131.13
Control	1168.9
Control	1338.2
ALS	0
ALS	0
ALS	0
ALS	0
ALS	0
ALS	0
ALS	0
ALS	38.9
ALS	115.7
ALS	212.5
ALS	322.5
ALS	346.44
ALS	396.3
ALS	484.3
ALS	493.5
ALS	792.7
ALS	966.21
ALS	1157.72
ALS	1399.3
ALS	1504
0 = below than 10

## Sheet: Fig. 3 А
	WT											FUS(1-359)
6-8 weeks	43.46	68.98	41.24	100.05	96.72	82.3	73.42	14.6	51.22	46.78	56.77	47.89	41.24	34.58	23.48	26.81	64.54	2.39	50.11	41.24	67.87	35.69	0
12-15 weeks	57.36	55.48	58.3	19.76	58.3	79.91	56.42	18.82	69.57	72.39		2.85	26.34	10.36	52.66	45.14	53.6	38.56	16	53.6

## Sheet: Fig. 3 B
	WT							FUS(1-359)
6-8 weeks	7.94	24.59	22.93	24.59	26.25	31.25	21.26	24.59	44.57	41.24	27.92	1.29
12-15 weeks	107.71	98.21	98.21	129.89	131.47	57.02		69.7	126.72	106.13	101.38	120.39	110.88	80.78	93.46	106.13

## Sheet: Table1
Patient Number	Gender, male/female	Age, years	Diagnosis	Age of onset ALS, years	Duration of ALS, months
1	f	66	ALS	65	19
2	f	77	ALS	77	6
3	f	57	ALS	57	3
4	m	50	ALS	49	11
5	f	63	ALS	62	11
6	f	73	ALS	73	7
7	m	57	ALS	57	7
8	m	32	ALS	30	22
9	f	62	ALS	62	2
10	f	55	ALS	55	3
1	f	77	-	-	-
2	f	35	-	-	-
3	m	35	-	-	-
4	f	52	-	-	-
5	f	47	-	-	-
6	f	35	-	-	-
7	f	79	-	-	-
8	m	51	-	-	-
9	m	79	-	-	-
10	m	48	-	-	-
11	f	35	-	-	-
12	f	66	-	-	-
